# Supplementary material
Source: PubMed Central journal article supplement (PMC9105823)
Supplement: NIHMS1746011-supplement-Supplemental_1.pdf [file NIHMS1746011-supplement-Supplemental_1.pdf]

## Successful weight loss maintenance: a systematic review of weight control registries

**Authors:** Catarina Paixão<sup>1</sup>, Carlos M. Dias<sup>2,3</sup>, Rui Jorge<sup>4,5</sup>, Eliana V. Carraça<sup>1</sup>, Mary Yannakoulia<sup>6</sup>, Martina de Zwaan<sup>7</sup>, Sirpa Soini<sup>8</sup>, James O. Hill<sup>9</sup>, Pedro J. Teixeira<sup>1</sup>, Inês Santos<sup>1,10\*</sup>

<sup>1</sup>CIPER, Faculdade de Motricidade Humana, Universidade de Lisboa, Cruz Quebrada Dafundo, Portugal

<sup>2</sup>Centro de Investigação em Saúde Pública (CISP), NOVA-Escola Nacional de Saúde Pública, Lisboa, Portugal

<sup>3</sup>Departamento de Epidemiologia, Instituto Nacional de Saúde Doutor Ricardo Jorge, Lisboa, Portugal

<sup>4</sup>Centro de Investigação Interdisciplinar Egas Moniz (CiiEM), Instituto Universitário Egas Moniz, Almada, Portugal

<sup>5</sup>Unidade de Investigação do Instituto Politécnico de Santarém, Escola Superior Agrária, Instituto Politécnico de Santarém, Santarém, Portugal

<sup>6</sup>Department of Nutrition and Dietetics, Harokopio University, Athens, Greece

<sup>7</sup>Department of Psychosomatic Medicine and Psychotherapy, Hannover Medical School, Germany

<sup>8</sup>Department of General Practice and Primary Health Care, University of Helsinki, Helsinki, Finland

<sup>9</sup>Department of Nutrition Sciences, University of Alabama at Birmingham, Birmingham, U.S.A.

<sup>10</sup>Laboratório de Nutrição, Faculdade de Medicina, Universidade de Lisboa, Lisboa, Portugal

**Correspondence:** Inês Santos

Centro Interdisciplinar para o Estudo da Performance Humana, Faculdade de Motricidade Humana, Universidade de Lisboa, Estrada da Costa, 1495-688 Cruz Quebrada, Portugal. Email: [isantos@fmh.ulisboa.pt](mailto:isantos@fmh.ulisboa.pt)

**Table S1.** Methodological quality assessment of articles.

| <b>Reference</b> | <b>Study design</b> | <b>Selection bias</b> | <b>Withdrawals and drop-outs</b> | <b>Confounders</b> | <b>Data collection</b> | <b>Data analysis</b> | <b>Reporting</b> | <b>Global</b>   |
|------------------|---------------------|-----------------------|----------------------------------|--------------------|------------------------|----------------------|------------------|-----------------|
| 4                | Moderate            | Weak                  | No rating                        | Strong             | Strong                 | Strong               | Strong           | <b>Moderate</b> |
| 5                | Moderate            | Weak                  | No rating                        | Strong             | Strong                 | Strong               | Strong           | <b>Moderate</b> |
| 6                | Moderate            | Weak                  | No rating                        | Strong             | Strong                 | Strong               | Strong           | <b>Moderate</b> |
| 7                | Moderate            | Weak                  | No rating                        | Strong             | Strong                 | Strong               | Strong           | <b>Moderate</b> |
| 8                | Moderate            | Weak                  | No rating                        | Strong             | Strong                 | Strong               | Strong           | <b>Moderate</b> |
| 21               | Moderate            | Weak                  | Moderate                         | Strong             | Strong                 | Strong               | Strong           | <b>Moderate</b> |
| 22               | Moderate            | Weak                  | No rating                        | Strong             | Strong                 | Strong               | Strong           | <b>Moderate</b> |
| 23               | Moderate            | Weak                  | Moderate                         | Strong             | Strong                 | Strong               | Strong           | <b>Moderate</b> |
| 24               | Moderate            | Weak                  | Moderate                         | Strong             | Strong                 | Strong               | Strong           | <b>Moderate</b> |
| 25               | Moderate            | Weak                  | Moderate                         | Strong             | Strong                 | Strong               | Strong           | <b>Moderate</b> |
| 26               | Moderate            | Weak                  | No rating                        | Strong             | Strong                 | Strong               | Moderate         | <b>Moderate</b> |
| 27               | Moderate            | Weak                  | Moderate                         | Strong             | Strong                 | Strong               | Strong           | <b>Moderate</b> |
| 28               | Moderate            | Weak                  | Moderate                         | Strong             | Strong                 | Strong               | Strong           | <b>Moderate</b> |
| 29               | Moderate            | Weak                  | No rating                        | Strong             | Strong                 | Strong               | Strong           | <b>Moderate</b> |

**Table S1.** Methodological quality assessment of articles (Continued).

| <b>Reference</b> | <b>Study design</b> | <b>Selection bias</b> | <b>Withdrawals and<br/>drop-outs</b> | <b>Confounders</b> | <b>Data collection</b> | <b>Data analysis</b> | <b>Reporting</b> | <b>Global</b>   |
|------------------|---------------------|-----------------------|--------------------------------------|--------------------|------------------------|----------------------|------------------|-----------------|
| 30               | Moderate            | Weak                  | Moderate                             | Strong             | Strong                 | Strong               | Strong           | <b>Moderate</b> |
| 31               | Moderate            | Weak                  | No rating                            | Strong             | Strong                 | Strong               | Strong           | <b>Moderate</b> |
| 32               | Moderate            | Weak                  | No rating                            | Strong             | Strong                 | Strong               | Strong           | <b>Moderate</b> |
| 33               | Moderate            | Weak                  | Moderate                             | Strong             | Strong                 | Strong               | Strong           | <b>Moderate</b> |
| 34               | Moderate            | Weak                  | No rating                            | Strong             | Strong                 | Strong               | Strong           | <b>Moderate</b> |
| 35               | Moderate            | Weak                  | No rating                            | Strong             | Strong                 | Strong               | Strong           | <b>Moderate</b> |
| 36               | Moderate            | Weak                  | No rating                            | Strong             | Strong                 | Strong               | Strong           | <b>Moderate</b> |
| 37               | Moderate            | Weak                  | No rating                            | Strong             | Strong                 | Strong               | Strong           | <b>Moderate</b> |
| 38               | Moderate            | Weak                  | No rating                            | Strong             | Strong                 | Strong               | Strong           | <b>Moderate</b> |
| 39               | Moderate            | Weak                  | No rating                            | Strong             | Strong                 | Strong               | Strong           | <b>Moderate</b> |
| 40               | Moderate            | Weak                  | No rating                            | Strong             | Strong                 | Strong               | Strong           | <b>Moderate</b> |
| 41               | Moderate            | Weak                  | Moderate                             | Strong             | Strong                 | Strong               | Strong           | <b>Moderate</b> |
| 42               | Moderate            | Weak                  | No rating                            | Strong             | Strong                 | Strong               | Strong           | <b>Moderate</b> |

**Table S1.** Methodological quality assessment of articles (Continued).

| <b>Reference</b> | <b>Study design</b> | <b>Selection bias</b> | <b>Withdrawals and drop-outs</b> | <b>Confounders</b> | <b>Data collection</b> | <b>Data analysis</b> | <b>Reporting</b> | <b>Global</b>   |
|------------------|---------------------|-----------------------|----------------------------------|--------------------|------------------------|----------------------|------------------|-----------------|
| 43               | Moderate            | Weak                  | Moderate                         | Strong             | Strong                 | Strong               | Strong           | <b>Moderate</b> |
| 44               | Moderate            | Weak                  | No rating                        | Strong             | Strong                 | Strong               | Strong           | <b>Moderate</b> |
| 45               | Moderate            | Weak                  | No rating                        | Strong             | Strong                 | Strong               | Moderate         | <b>Moderate</b> |
| 46               | Moderate            | Weak                  | No rating                        | Strong             | Strong                 | Strong               | Strong           | <b>Moderate</b> |
| 47               | Moderate            | Weak                  | No rating                        | Strong             | Strong                 | Weak                 | Strong           | <b>Weak</b>     |
| 48               | Moderate            | Weak                  | Moderate                         | Strong             | Moderate               | Strong               | Strong           | <b>Moderate</b> |
| 49               | Moderate            | Weak                  | No rating                        | Strong             | Strong                 | Strong               | Strong           | <b>Moderate</b> |
| 50               | Moderate            | Weak                  | No rating                        | Strong             | Moderate               | Strong               | Strong           | <b>Moderate</b> |
| 51               | Moderate            | Weak                  | Moderate                         | Strong             | Strong                 | Strong               | Strong           | <b>Moderate</b> |
| 52               | Moderate            | Weak                  | No rating                        | Weak               | Strong                 | Strong               | Strong           | <b>Weak</b>     |
| 53               | Moderate            | Weak                  | No rating                        | Strong             | Strong                 | Strong               | Strong           | <b>Moderate</b> |
| 54               | Moderate            | Weak                  | No rating                        | Strong             | Strong                 | Strong               | Strong           | <b>Moderate</b> |
| 55               | Moderate            | Weak                  | No rating                        | Strong             | Moderate               | Strong               | Strong           | <b>Moderate</b> |
| 56               | Moderate            | Weak                  | No rating                        | Strong             | Strong                 | Strong               | Strong           | <b>Moderate</b> |

**Table S1.** Methodological quality assessment of articles (Continued).

| <b>Reference</b> | <b>Study design</b> | <b>Selection bias</b> | <b>Withdrawals and<br/>drop-outs</b> | <b>Confounders</b> | <b>Data collection</b> | <b>Data analysis</b> | <b>Reporting</b> | <b>Global</b>   |
|------------------|---------------------|-----------------------|--------------------------------------|--------------------|------------------------|----------------------|------------------|-----------------|
| 57               | Moderate            | Weak                  | Moderate                             | Strong             | Strong                 | Strong               | Strong           | <b>Moderate</b> |
| 58               | Moderate            | Weak                  | No rating                            | Strong             | Moderate               | Strong               | Strong           | <b>Moderate</b> |
| 59               | Moderate            | Weak                  | No rating                            | Weak               | Weak                   | Strong               | Strong           | <b>Weak</b>     |
| 60               | Moderate            | Weak                  | No rating                            | Strong             | Strong                 | Strong               | Strong           | <b>Moderate</b> |
| 61               | Moderate            | Weak                  | No rating                            | Strong             | Weak                   | Strong               | Strong           | <b>Weak</b>     |
| 62               | Moderate            | Weak                  | No rating                            | Strong             | Strong                 | Strong               | Strong           | <b>Moderate</b> |
| 63               | Moderate            | Weak                  | No rating                            | Strong             | Strong                 | Strong               | Strong           | <b>Moderate</b> |
| 64               | Moderate            | Weak                  | No rating                            | Strong             | Strong                 | Strong               | Strong           | <b>Moderate</b> |
| 65               | Moderate            | Weak                  | No rating                            | Strong             | Strong                 | Strong               | Strong           | <b>Moderate</b> |
| 66               | Moderate            | Weak                  | No rating                            | Strong             | Strong                 | Strong               | Strong           | <b>Moderate</b> |
| 67               | Moderate            | Weak                  | No rating                            | Strong             | Strong                 | Strong               | Strong           | <b>Moderate</b> |

**Table S2.** Weight control registries' and participants' characteristics.

| <b>Designation</b>                           | <b>National Weight Control Registry (NWCR)</b><br>4,5,21-51                                                                                                                                                                      | <b>Portuguese Weight Control Registry (PWCR)</b><br>6,52-54                                                                                                                                                                                                      | <b>German Weight Control Registry (GWCR)</b><br>8,55-58                                     | <b>Finnish Weight Control Registry (FWCR)</b><br>7,59-61                                                                                                                | <b>MedWeight</b><br>62-67                                                                            |
|----------------------------------------------|----------------------------------------------------------------------------------------------------------------------------------------------------------------------------------------------------------------------------------|------------------------------------------------------------------------------------------------------------------------------------------------------------------------------------------------------------------------------------------------------------------|---------------------------------------------------------------------------------------------|-------------------------------------------------------------------------------------------------------------------------------------------------------------------------|------------------------------------------------------------------------------------------------------|
| <b>Weight Control Registries' Procedures</b> |                                                                                                                                                                                                                                  |                                                                                                                                                                                                                                                                  |                                                                                             |                                                                                                                                                                         |                                                                                                      |
| <b>Informed consent form</b>                 | Yes                                                                                                                                                                                                                              | Yes                                                                                                                                                                                                                                                              | Yes                                                                                         | Yes                                                                                                                                                                     | Yes                                                                                                  |
| <b>Ethical approval</b>                      | Yes. By the Miriam Hospital Institutional Review Board for the Protection of Human Subjects in Research.                                                                                                                         | Yes. By the Ethics Committee of the Faculty of Human Kinetics, University of Lisbon.                                                                                                                                                                             | Yes. By the Ethics Committee of the Medical School at the University of Erlangen-Nuremberg. | Yes. By the Ethics Committee, Department of Medicine, Helsinki University Hospital.                                                                                     | Yes. By the Harokopio University Ethics Committee.                                                   |
| <b>Recruitment procedure</b>                 | Local media (newspapers, magazines, radio, and television); physician and dietitian referrals; mailing lists of commercial weight loss programs.<br>Website:<br><a href="http://www.nwcr.ws">http://www.nwcr.ws</a> <sup>a</sup> | Local and social media (newspapers, radio, television, Facebook); partnership with the General Directorate-General of Health and with gyms/health clubs/companies. Website:<br><a href="http://panosr.fmh.ulisboa.pt/rncp">http://panosr.fmh.ulisboa.pt/rncp</a> | Local media (press conferences, broad publicity campaign)                                   | Local media (free and paid newspapers and magazines); healthcare centers and hospitals.<br>Website:<br><a href="http://www.sphr.fi">http://www.sphr.fi</a> <sup>a</sup> | Local and social media.<br>Website;<br><a href="http://medweight.hua.gr">http://medweight.hua.gr</a> |
| <b>Rewards for participation</b>             | To improve the 3-year response rate, individuals who did not complete the full assessment battery were sent \$5 and asked to report their weight.                                                                                | No                                                                                                                                                                                                                                                               | A financial compensation was offered for follow-up measurements.                            | No <sup>b</sup>                                                                                                                                                         | No                                                                                                   |

**Table S2.** Weight control registries' and participants' characteristics (Continued).

| <b>Designation</b>                                        | <b>National Weight Control Registry (NWCR)</b><br>4,5,21-51                                                                                                                                                                | <b>Portuguese Weight Control Registry (PWCR)</b><br>6,52-54                                                                                                                                                                | <b>German Weight Control Registry (GWCR)</b><br>8,55-58 | <b>Finnish Weight Control Registry (FWCR)</b><br>7,59-61                                                                                            | <b>MedWeight</b><br>62-67      |
|-----------------------------------------------------------|----------------------------------------------------------------------------------------------------------------------------------------------------------------------------------------------------------------------------|----------------------------------------------------------------------------------------------------------------------------------------------------------------------------------------------------------------------------|---------------------------------------------------------|-----------------------------------------------------------------------------------------------------------------------------------------------------|--------------------------------|
| <b>Weight Control Registries' Procedures (Continued)</b>  |                                                                                                                                                                                                                            |                                                                                                                                                                                                                            |                                                         |                                                                                                                                                     |                                |
| <b>Eligibility screening</b>                              | Online/e-mail/telephone registration; telephone screening questionnaire; contact of a health professional, family member, or friend who could confirm participants' weight loss, or before-and-after weight loss pictures. | Online/e-mail/telephone registration; telephone screening questionnaire; contact of a health professional, family member, or friend who could confirm participants' weight loss, or before-and-after weight loss pictures. | Telephone/letter or online screening questionnaire      | Online screening questionnaire; participants' weight history could be confirmed (if necessary) through their healthcare system/network <sup>b</sup> | Online screening questionnaire |
| <b>Assessments and instruments (baseline)<sup>c</sup></b> |                                                                                                                                                                                                                            |                                                                                                                                                                                                                            |                                                         |                                                                                                                                                     |                                |
| <b>Assessments (format)</b>                               | Offsite; Paper form or Online <sup>b</sup>                                                                                                                                                                                 | Onsite or offsite (when participants were not able to go to the site); Paper form                                                                                                                                          | Offsite; Online (secuTrial software) or paper form      | Offsite; Online (individualized link)                                                                                                               | Offsite; Online                |

**Table S2.** Weight control registries' and participants' characteristics (Continued).

| Designation                                                           | National Weight Control Registry (NWCR)<br>4,5,21-51                                                                                                                                                                                                                                                                                                                                                                                                                                               | Portuguese Weight Control Registry (PWCR)<br>6,52-54                                                                                                                                                                                                                                                                                                                                                                                                                               | German Weight Control Registry (GWCR)<br>8,55-58                                                                                                                                                                                                                                                                                                                                                                                                                 | Finnish Weight Control Registry (FWCR)<br>7,59-61                                                                                                                                                                                                                                                                                                                                                                                                                                                                                                                                                                                                                                                                                           | MedWeight<br>62-67                                                                                                                                                                                                                                                                                                                                                                                                                                                                                                                                                                                                                                                                                                                                            |
|-----------------------------------------------------------------------|----------------------------------------------------------------------------------------------------------------------------------------------------------------------------------------------------------------------------------------------------------------------------------------------------------------------------------------------------------------------------------------------------------------------------------------------------------------------------------------------------|------------------------------------------------------------------------------------------------------------------------------------------------------------------------------------------------------------------------------------------------------------------------------------------------------------------------------------------------------------------------------------------------------------------------------------------------------------------------------------|------------------------------------------------------------------------------------------------------------------------------------------------------------------------------------------------------------------------------------------------------------------------------------------------------------------------------------------------------------------------------------------------------------------------------------------------------------------|---------------------------------------------------------------------------------------------------------------------------------------------------------------------------------------------------------------------------------------------------------------------------------------------------------------------------------------------------------------------------------------------------------------------------------------------------------------------------------------------------------------------------------------------------------------------------------------------------------------------------------------------------------------------------------------------------------------------------------------------|---------------------------------------------------------------------------------------------------------------------------------------------------------------------------------------------------------------------------------------------------------------------------------------------------------------------------------------------------------------------------------------------------------------------------------------------------------------------------------------------------------------------------------------------------------------------------------------------------------------------------------------------------------------------------------------------------------------------------------------------------------------|
| <b>Assessments and instruments (baseline)<sup>c</sup> (Continued)</b> |                                                                                                                                                                                                                                                                                                                                                                                                                                                                                                    |                                                                                                                                                                                                                                                                                                                                                                                                                                                                                    |                                                                                                                                                                                                                                                                                                                                                                                                                                                                  |                                                                                                                                                                                                                                                                                                                                                                                                                                                                                                                                                                                                                                                                                                                                             |                                                                                                                                                                                                                                                                                                                                                                                                                                                                                                                                                                                                                                                                                                                                                               |
| <b>Participant characterization</b>                                   | <ul style="list-style-type: none"> <li>i) Sociodemographic information (e.g., age, sex, education level, marital status, ethnicity);</li> <li>ii) Weight history (age at onset of overweight, parental and sibling weight status, maximum lifetime weight, current weight, and duration of the required minimum weight loss);</li> <li>iii) Health history;</li> <li>iv) Weight history timeline (to assess weight changes);</li> <li>v) Weight loss and weight maintenance strategies.</li> </ul> | <ul style="list-style-type: none"> <li>i) Sociodemographic information (e.g., age, sex, marital status, employment status, education level, smoking status);</li> <li>ii) Weight history (family weight history, previous weight loss attempts; motives and triggers to lose weight);</li> <li>iii) Weight history timeline (to assess weight changes);<sup>b</sup></li> <li>iv) Health history;<sup>b</sup></li> <li>v) Weight loss and weight maintenance strategies.</li> </ul> | <ul style="list-style-type: none"> <li>i) Sociodemographic data (e.g., age, sex, partnership, employment status, education level);</li> <li>ii) Weight history;</li> <li>iii) Weight loss strategies;</li> <li>iv) Reasons for weight loss;</li> <li>v) Weight cycling;</li> <li>vi) Frequency of weighing;</li> <li>vii) Medical co-morbidity; Health care utilization;</li> <li>viii) Obesity attribution;</li> <li>ix) Eating and weighing habits.</li> </ul> | <ul style="list-style-type: none"> <li>i) Sociodemographic information (e.g., age, sex, marital status, size of household, type of accommodation, education, work, earnings, religion, if the participant is a woman: number of children, menstruation started/ended);</li> <li>ii) Weight history (history of weight loss attempts/ methods; motivational factors);</li> <li>iii) General health (medication, participant and relatives' diseases, subjective health);</li> <li>iv) Lifestyle habits (smoking habit, alcohol consumption, sleep, leisure time, physical activity);</li> <li>v) Changes in diet, eating habit, exercise, weighing;</li> <li>vi) Knowledge (health risks, nutritional content and energy intake);</li> </ul> | <ul style="list-style-type: none"> <li>i) Sociodemographic information (e.g., age, sex, education level, marital status, employment status, type of occupation, type of residence area, siblings);</li> <li>ii) Weight history (weight loss methods, weight loss and maintenance motives, frequency of self-weighing, history of overweight during childhood/adolescence);</li> <li>iii) Previous body weight cycles - 25-item <b>Weight Cycling Questionnaire</b>;</li> <li>iv) Medical history (including gastrointestinal function);</li> <li>v) Lifestyle habits (Smoking status, sleep quality assessed through the validated Greek version of the <b>Athens Insomnia Scale – AIS</b>, frequency of leisure time activities and socializing);</li> </ul> |



Table S2. Weight control registries' and participants' characteristics (Continued).

| Designation                                                           | National Weight Control Registry (NWCR)<br>4,5,21-51                                                                                                                                                                                                                                                                                                                                                                                | Portuguese Weight Control Registry (PWCR)<br>6,52-54                                                                                                                                                                                                                                                                                                                   | German Weight Control Registry (GWCR)<br>8,55-58                                                                                                                                                                                                                                                                                                                                                                                                                                                                                                               | Finnish Weight Control Registry (FWCR)<br>7,59-61                                                                           | MedWeight<br>62-67                                                                                                                                                                                                                                                                                                                                                                |
|-----------------------------------------------------------------------|-------------------------------------------------------------------------------------------------------------------------------------------------------------------------------------------------------------------------------------------------------------------------------------------------------------------------------------------------------------------------------------------------------------------------------------|------------------------------------------------------------------------------------------------------------------------------------------------------------------------------------------------------------------------------------------------------------------------------------------------------------------------------------------------------------------------|----------------------------------------------------------------------------------------------------------------------------------------------------------------------------------------------------------------------------------------------------------------------------------------------------------------------------------------------------------------------------------------------------------------------------------------------------------------------------------------------------------------------------------------------------------------|-----------------------------------------------------------------------------------------------------------------------------|-----------------------------------------------------------------------------------------------------------------------------------------------------------------------------------------------------------------------------------------------------------------------------------------------------------------------------------------------------------------------------------|
| <b>Assessments and instruments (baseline)<sup>c</sup> (Continued)</b> |                                                                                                                                                                                                                                                                                                                                                                                                                                     |                                                                                                                                                                                                                                                                                                                                                                        |                                                                                                                                                                                                                                                                                                                                                                                                                                                                                                                                                                |                                                                                                                             |                                                                                                                                                                                                                                                                                                                                                                                   |
| <b>Participant characterization (Continued)</b>                       |                                                                                                                                                                                                                                                                                                                                                                                                                                     |                                                                                                                                                                                                                                                                                                                                                                        |                                                                                                                                                                                                                                                                                                                                                                                                                                                                                                                                                                | vii) Difficulties and support during weight loss and maintenance.                                                           | vi) Dietary behaviors (eating rate, involvement in meal preparation).                                                                                                                                                                                                                                                                                                             |
| <b>Psychometry</b>                                                    | i) Depressive symptoms – <b>Center for Epidemiological Studies Depression Scale (CES-D)</b> ;<br>ii) Stressful situations appraisal – <b>Perceived Stress Scale (PSS4)</b> ;<br>iii) Frequency of objective binge eating episodes over the previous 28 days – <b>Eating Disorder Examination-Questionnaire (EDE-Q)</b> ;<br>iv) Psychiatric symptoms – <b>General Symptom Index (Symptom Checklist-90 Revised – SCL-90-R)</b> ;<br> | i) General health-related quality of life – <b>Short-Form Health-Related Quality of Life (SF-36)</b> ;<br>ii) Weight-related quality of life – <b>Impact of Weight on Quality of Life (IWQOL)</b> ;<br>iii) Self-esteem – <b>Rosenberg Self-Concept/Self-Esteem Scale</b> ;<br>iv) Body image dissatisfaction – <b>Body Image Assessment Questionnaire (BIA)</b> ;<br> | i) Weight-specific measure of health-related quality of life – <b>Impact of Weight on Quality-of-Life-Lite Scale</b> ;<br>ii) Depressive and somatic symptoms – subscales of the German version of <b>Patient Health Questionnaire (PHQ-D)</b> ;<br>iii) Impulsivity – <b>Barrett Impulsiveness Scale</b> ;<br>iv) Social support – seven-item short form <b>Social Support Questionnaire (F-Sozu-7)</b> ;<br>v) Retrospective effect of weight-related teasing – <b>Effect Subscale of the German version of the Perception of Teasing Scale (POTS)</b> ;<br> | i) <b>Finnish version of the Ten Item Personality Inventory (TIPI)</b> to measure personality traits according to the FFM5. | i) Personality traits – <b>Ten Item personality Traits (TIPI)</b> ;<br>ii) Trait of impulsivity – validated Greek version of the <b>Barratt Impulsiveness Scale (BIS)</b> ;<br>iii) Perceived control of weight status/fluctuations – <b>Multidimensional Health Locus of Control - MHLC scales</b> ;<br>iv) Social support – <b>Social support for Healthy Behaviors scale</b> . |

**Table S2.** Weight control registries' and participants' characteristics (Continued).

| Designation                                                           | National Weight Control Registry (NWCR)<br>4,5,21-51                                                                             | Portuguese Weight Control Registry (PWCR)<br>6,52-54                                                                                                                                                                                                                                                                                                                                                                                                                                                          | German Weight Control Registry (GWCR)<br>8,55-58                                                                                                                                                                                                                         | Finnish Weight Control Registry (FWCR)<br>7,59-61 | MedWeight<br>62-67 |
|-----------------------------------------------------------------------|----------------------------------------------------------------------------------------------------------------------------------|---------------------------------------------------------------------------------------------------------------------------------------------------------------------------------------------------------------------------------------------------------------------------------------------------------------------------------------------------------------------------------------------------------------------------------------------------------------------------------------------------------------|--------------------------------------------------------------------------------------------------------------------------------------------------------------------------------------------------------------------------------------------------------------------------|---------------------------------------------------|--------------------|
| <b>Assessments and instruments (baseline)<sup>c</sup> (Continued)</b> |                                                                                                                                  |                                                                                                                                                                                                                                                                                                                                                                                                                                                                                                               |                                                                                                                                                                                                                                                                          |                                                   |                    |
| <b>Psychometry (Continued)</b>                                        | v) Eating behavior (cognitive restraint, disinhibition and hunger) – <b>Eating Inventory/ Three-Factor Eating Questionnaire.</b> | v) Experience of and preoccupation with being fat – <b>Body Shape Questionnaire (BSQ);</b><br>vi) Exercise motivation – <b>Intrinsic Motivation Inventory (IMI);</b><br>vii) Self-efficacy for exercise – <b>Exercise Self-Efficacy Questionnaire (ESE);</b><br>viii) Social support for exercise – <b>Exercise Social Support (ESS);</b><br>ix) External, introjected, identified and intrinsic forms of regulation for exercise behavior – <b>Behavioral Regulation in Exercise Questionnaire (BREQ-2);</b> | vi) Non-normative eating behaviors and eating-related psychopathology – <b>Eating Disorder Examination-Questionnaire (EDE-Q);</b><br>vii) Eating behavior (restrained eating, emotional eating and external eating) – <b>Dutch Eating Behavior Questionnaire (DEBQ).</b> |                                                   |                    |

Table S2. Weight control registries' and participants' characteristics (Continued).

| Designation                                                           | National Weight Control Registry (NWCR)<br>4,5,21-51 | Portuguese Weight Control Registry (PWCR)<br>6,52-54                                                                                                                                                                                                                                                                                                                                                                                                                                                                                                                           | German Weight Control Registry (GWCR)<br>8,55-58 | Finnish Weight Control Registry (FWCR)<br>7,59-61 | MedWeight<br>62-67 |
|-----------------------------------------------------------------------|------------------------------------------------------|--------------------------------------------------------------------------------------------------------------------------------------------------------------------------------------------------------------------------------------------------------------------------------------------------------------------------------------------------------------------------------------------------------------------------------------------------------------------------------------------------------------------------------------------------------------------------------|--------------------------------------------------|---------------------------------------------------|--------------------|
| <b>Assessments and instruments (baseline)<sup>c</sup> (Continued)</b> |                                                      |                                                                                                                                                                                                                                                                                                                                                                                                                                                                                                                                                                                |                                                  |                                                   |                    |
| <b>Psychometry (Continued)</b>                                        |                                                      | x) Eating behavior (cognitive restraint, disinhibition and perceived hunger) – <b>Eating Inventory/ Three-Factor Eating Questionnaire;</b><br>xi) Eating behavior (restrained eating, emotional eating and external eating) – <b>Dutch Eating Behavior Questionnaire (DEBQ);</b><br>xii) Stress response – <b>Coping Questionnaire (COPE);</b><br>xiii) Depressive symptoms – <b>Beck Depression Inventory (BDI);</b><br>xiv) Social and physical anxiety – <b>Social Physique Anxiety Scale;</b><br>xv) Self-determined way of functioning – <b>Self Determination Scale;</b> |                                                  |                                                   |                    |

**Table S2.** Weight control registries' and participants' characteristics (Continued).

| Designation                                                           | National Weight Control Registry (NWCR)<br>4,5,21-51                                                                                                  | Portuguese Weight Control Registry (PWCR)<br>6,52-54                                                                                                                 | German Weight Control Registry (GWCR)<br>8,55-58                          | Finnish Weight Control Registry (FWCR)<br>7,59-61 | MedWeight<br>62-67                                                                                                                                                                                                                                                                                 |
|-----------------------------------------------------------------------|-------------------------------------------------------------------------------------------------------------------------------------------------------|----------------------------------------------------------------------------------------------------------------------------------------------------------------------|---------------------------------------------------------------------------|---------------------------------------------------|----------------------------------------------------------------------------------------------------------------------------------------------------------------------------------------------------------------------------------------------------------------------------------------------------|
| <b>Assessments and instruments (baseline)<sup>c</sup> (Continued)</b> |                                                                                                                                                       |                                                                                                                                                                      |                                                                           |                                                   |                                                                                                                                                                                                                                                                                                    |
| <b>Psychometry (Continued)</b>                                        |                                                                                                                                                       | xvi) Basic needs satisfaction in general – <b>Basic Need Satisfaction Scale (BNS).</b>                                                                               |                                                                           |                                                   |                                                                                                                                                                                                                                                                                                    |
| <b>Dietary intake</b>                                                 | Total energy intake (kcal/day), macronutrients (fat, carbohydrates and protein) and micronutrients intake – <b>Block Food Frequency Questionnaire</b> | Total energy intake (kcal/day) and macronutrients (fat, carbohydrates and protein) and micronutrients intake – <b>Semi-quantitative food-frequency questionnaire</b> | Food intake structure questionnaire; Hedonics of food intake <sup>b</sup> | Food intake structure questionnaire <sup>b</sup>  | Total energy intake (kcal/day), macronutrients (fat, carbohydrates and protein) intake; food groups intake, adherence to the Mediterranean diet, meal patterns and environmental aspects of the meal – Two telephone <b>24-h dietary recalls</b> (conducted 10 days apart, weekdays and weekends). |

**Table S2.** Weight control registries' and participants' characteristics (Continued).

| <b>Designation</b>                                                    | <b>National Weight Control Registry (NWCR)</b><br>4,5,21-51                                                                                                                                                                                       | <b>Portuguese Weight Control Registry (PWCR)</b><br>6,52-54                                                                                                                                                                                                                                                         | <b>German Weight Control Registry (GWCR)</b><br>8,55-58                                                                                               | <b>Finnish Weight Control Registry (FWCR)</b><br>7,59-61                                                          | <b>MedWeight</b><br>62-67                                                                                                                                                 |
|-----------------------------------------------------------------------|---------------------------------------------------------------------------------------------------------------------------------------------------------------------------------------------------------------------------------------------------|---------------------------------------------------------------------------------------------------------------------------------------------------------------------------------------------------------------------------------------------------------------------------------------------------------------------|-------------------------------------------------------------------------------------------------------------------------------------------------------|-------------------------------------------------------------------------------------------------------------------|---------------------------------------------------------------------------------------------------------------------------------------------------------------------------|
| <b>Assessments and instruments (baseline)<sup>c</sup> (Continued)</b> |                                                                                                                                                                                                                                                   |                                                                                                                                                                                                                                                                                                                     |                                                                                                                                                       |                                                                                                                   |                                                                                                                                                                           |
| <b>Physical Activity</b>                                              | Minutes of light, moderate and vigorous physical activity, sedentary activities, sleep<br>i) <b>Accelerometry</b> ; <sup>b</sup><br>ii) <b>Doubly labelled water</b> ; <sup>b</sup><br>iii) <b>Paffenbarger Physical Activity Questionnaire</b> . | Minutes of light, moderate and vigorous physical activity, lifestyle physical activity, sedentary activities, sleep<br>i) <b>Accelerometry</b> ;<br>ii) <b>Paffenbarger Physical Activity Questionnaire</b> ;<br>iii) <b>Seven-day Physical Activity Recall</b> ;<br>iv) <b>Lifestyle Physical Activity Index</b> . | Minutes of walking, moderate and vigorous physical activity, sedentary activities – <b>International Physical Activity Questionnaire</b> <sup>b</sup> | Occupational and leisure-time physical activity – <b>Saltin-Grimby Physical Activity Level Scale</b> <sup>b</sup> | Minutes of walking moderate and vigorous physical activity, sedentary activities – Greek short version of the <b>International Physical Activity Questionnaire (IPAQ)</b> |
| <b>Anthropometry</b>                                                  | Self-reported weight and height                                                                                                                                                                                                                   | Objectively measured weight, height and waist circumference                                                                                                                                                                                                                                                         | Self-reported weight and height                                                                                                                       | Self-reported weight and height                                                                                   | Self-reported weight and height                                                                                                                                           |

<sup>a</sup>Websites were provided as an extra information, even they were not part of the recruitment procedure.

<sup>b</sup>This information was provided by the Principal Investigator of the weight control registry.

<sup>c</sup>Follow-up assessments differ from baseline and will not be reported as there is not much information, or it is somehow contradictory.
